# Supplementary material for: Dietary emulsifiers consumption alters anxiety-like and social-related behaviors in mice in a sex-dependent manner
Source: PubMed Central journal article supplement (PMC6336787; doi:10.1038/s41598-018-36890-3), 2019-01-17
Supplement: 41598_2018_36890_MOESM1_ESM.pdf [file 41598_2018_36890_MOESM1_ESM.pdf]

1 **Dietary emulsifiers consumption alters anxiety-like and social-related behaviors**  
2 **in mice in a sex-dependent manner**

3  
4 Mary K. Holder<sup>1a</sup>, Nicole V. Peters<sup>1</sup>, Jack Whylings<sup>1</sup>, Christopher T. Fields<sup>1</sup>, Andrew T. Gewirtz,<sup>2</sup>  
5 Benoit Chassaing<sup>1,2,3</sup>, and Geert J. de Vries<sup>1,3</sup>  
6

7 <sup>1</sup> Neuroscience Institute, Georgia State University, Atlanta, GA 30303, USA

8 <sup>2</sup> Institute for Biomedical Sciences, Georgia State University, Atlanta, GA 30303, USA

9 <sup>3</sup> These authors contributed equally  
10

11 **Corresponding authors:**

12 Geert J. de Vries

13 PO Box 5030

14 Atlanta, GA 30302-5030

15 404-413-5558

16 Email: [devries@gsu.edu](mailto:devries@gsu.edu)

17  
18 Benoit Chassaing

19 Georgia State University

20 Atlanta GA 30303

21 404-413-6225

22 Email: [bchassaing@gsu.edu](mailto:bchassaing@gsu.edu)

23  
24 <sup>a</sup>Current affiliation:

25 School of Psychology

26 Georgia Institute of Technology

27 Atlanta, GA 30332, USA  
28  
29

30 **Keywords:** microbiota; anxiety; sociability; carboxymethylcellulose; polysorbate 80; alpha-  
31 melanocyte stimulating hormone; agouti-related peptide

32 **Supplemental Figure Legends**

33 **Supplemental Figure 1. Experimental Timeline.** Male and female C57Bl/6 mice were weaned  
34 on post-natal day 21 (P21), started on either water control or a 1% solution of either sodium  
35 carboxymethylcellulose (CMC) or polysorbate-80 (P80). In addition, feces were collected for  
36 microbiota analysis. Behavioral testing started at P70, with one test per week in the order  
37 indicated. One day after completing the last behavioral test, animals were euthanized and feces,  
38 the brain and other organs were collected.

39

40 **Supplemental Figure 2. Effects of dietary emulsifiers on microbiota.** Male and female  
41 C57Bl/6 mice were exposed to drinking water containing CMC or P80 (1%). Linear discriminant  
42 analysis coupled with Effect Size (LEfSe) was of taxa that differ significantly between male and  
43 female mice within water, CCM, and P80 treatments at time of weaning, P21 and at the time of  
44 collections, P105. Phylogenetic branching that differs by treatment within male (A, B) and  
45 female (E, F) mice at P21 and within male (C, D) and female (G, H) mice at P105.

46

47 **Supplemental Figure 3. Sex differences in microbiota in mice treated with dietary**  
48 **emulsifiers.** Male and female C57Bl/6 mice were exposed to drinking water containing CMC or  
49 P80 (1%) in data previously reported in Extended Data Figure 3 in Chassaing et al., 2015.  
50 Principal coordinates analysis (PCoA) of the unweighted UniFrac distance matrix of fecal  
51 microbiota showing clustering by treatment when male and female mice are combined into a  
52 single PCoA (A). Treatment group is indicated by point color (blue, water; orange, CMC; purple,  
53 P80). PCoA of the unweighted UniFrac distance matrix of fecale microbiota also show clustering  
54 by sex in (B). Sex is indicated by point color (red, female; green, male).

55

56 **Supplemental Figure 4. Additional measures of anxiety-like behaviors in mice treated**  
57 **with emulsifiers.** Male and female C57Bl/6 mice were exposed to drinking water containing

58 CMC or P80 (1%) for 12 weeks and tested for anxiety-like behavior weekly starting at P70. (A)  
59 There was no effect of either emulsifier-treatment [ $F_{(2, 29)} = 0.106$ ,  $p=0.90$ ] or sex [ $F_{(1, 29)} = 0.59$ ,  
60  $p=0.45$ ] on the distance traveled in the open field arena. (B) There was no effect of either  
61 emulsifier-treatment [ $F_{(2, 29)} = 0.1995$ ,  $p=0.82$ ] or sex [ $F_{(1, 29)} = 0.1972$ ,  $p=0.66$ ] on the time spent  
62 on the open arms. (C) The number of entries onto the open arms was not affected by either  
63 emulsifier treatment [ $F_{(2, 29)} = 0.006$ ,  $p=0.99$ ] or sex [ $F_{(1, 29)} = 0.05$ ,  $p=0.82$ ]. (D) There was no  
64 effect of either emulsifier-treatment [ $F_{(2, 29)} = 0.11$ ,  $p=0.90$ ] or sex [ $F_{(1, 29)} = 0.13$ ,  $p=0.73$ ] on the  
65 time spent in the closed arms. (E) The number of entries into the closed arms was not affected  
66 by either emulsifier treatment [ $F_{(2, 29)} = 2.18$ ,  $p=0.13$ ] or sex [ $F_{(1, 29)} = 3.09$ ,  $p=0.09$ ]. (F) There  
67 was no effect of either emulsifier-treatment [ $F_{(2, 29)} = 0.07$ ,  $p=0.92$ ] or sex [ $F_{(1, 29)} = 0.68$ ,  $p=0.41$ ]  
68 on the time spent in the light in the light/dark box. Data are represented as means + SEM (n=5-  
69 6).

70

71 **Supplemental Figure 5. Sex difference in relative weight gain in mice treated with dietary**  
72 **emulsifiers.** Male and female C57Bl/6 mice were exposed to drinking water containing CMC or  
73 P80 (1%) for 12 weeks. There was a significant interaction of time on treatment, treatment, and  
74 sex on the relative body weights in the mice over time [ $F_{(24, 348)} = 1.863$ ,  $p<0.05$ ]. In addition  
75 post-hoc analyses indicated that 6 weeks of emulsifier consumption lead to a greater body  
76 weight in male, but not female mice ( $*p<0.05$ ). Data are represented as means + SEM (n=5-6).

77

78 **Supplemental Figure 6. Representative photomicrographs of Agouti-Related Peptide**  
79 **(AgRP) and alpha-melanocortin stimulation hormone ( $\alpha$ MSH).** Photomicrographs showing  
80 the immunoreactivity (IR) for AgRP in (A) the paraventricular nucleus of the thalamus (PVT) and  
81 (B) the arcuate nucleus (Arc). Photomicrographs showing  $\alpha$ MSH-IR in (C) PVT and (D) Arc.

82 Scale bar: 100 $\mu$ m.

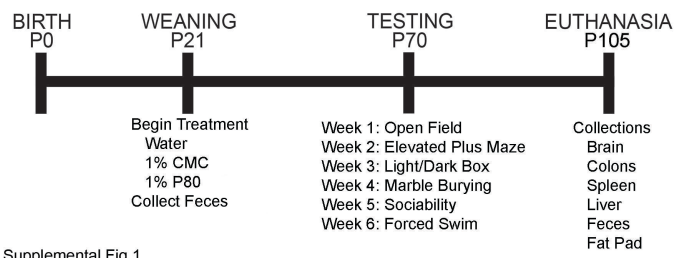

Supplemental Fig 1

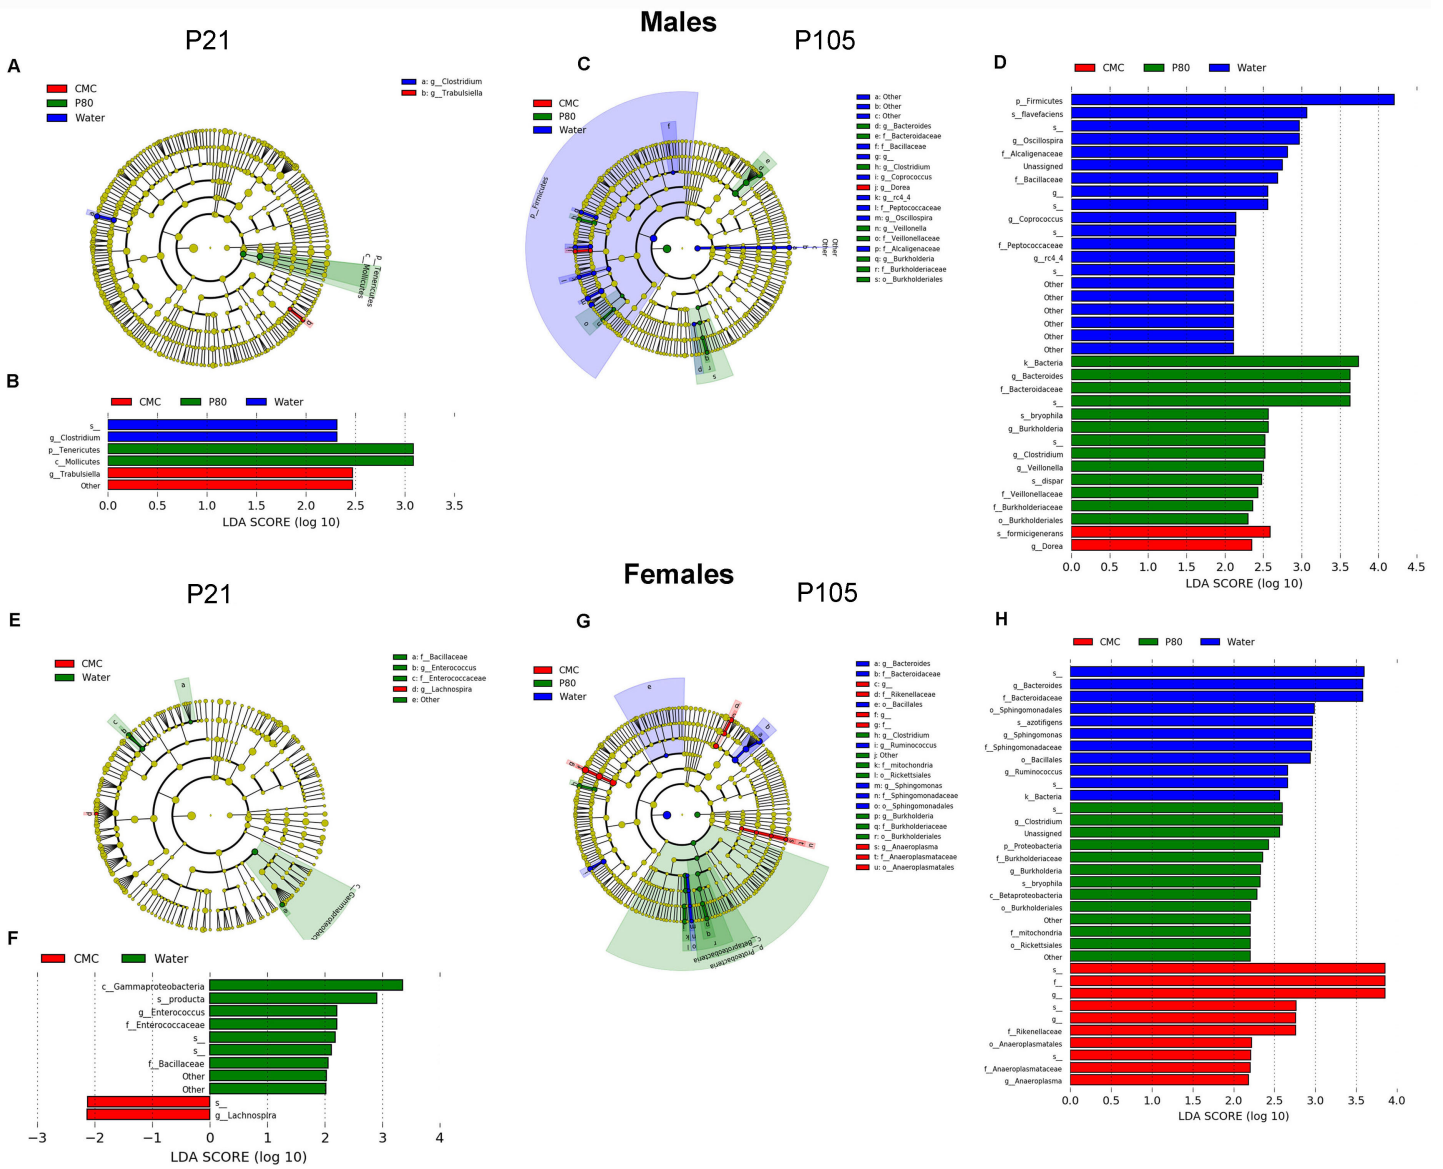

Supplemental Fig 2

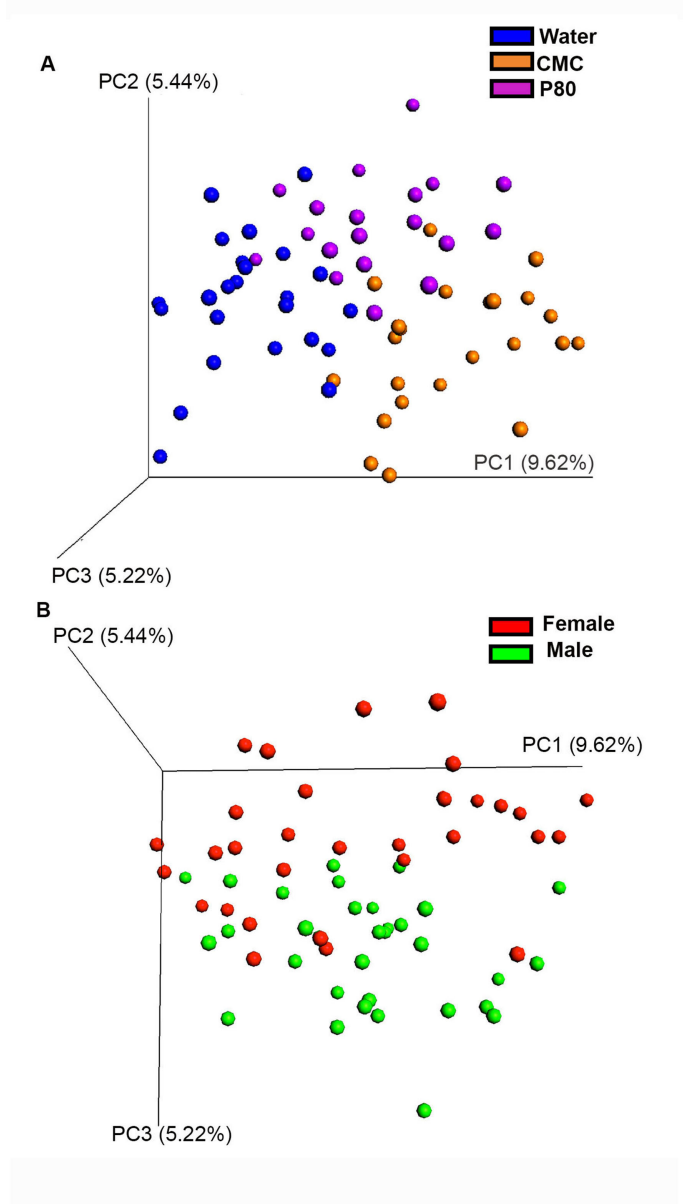

Supplemental Fig. 3

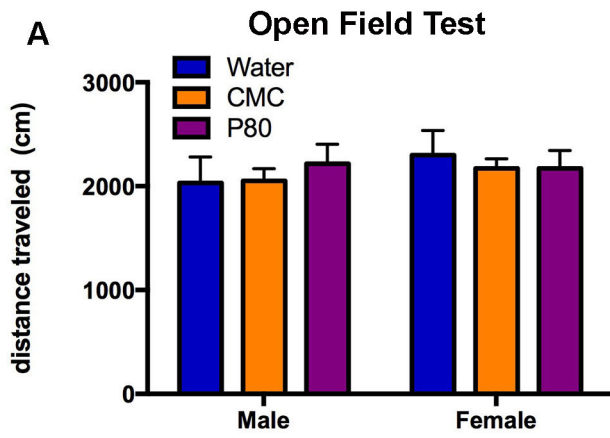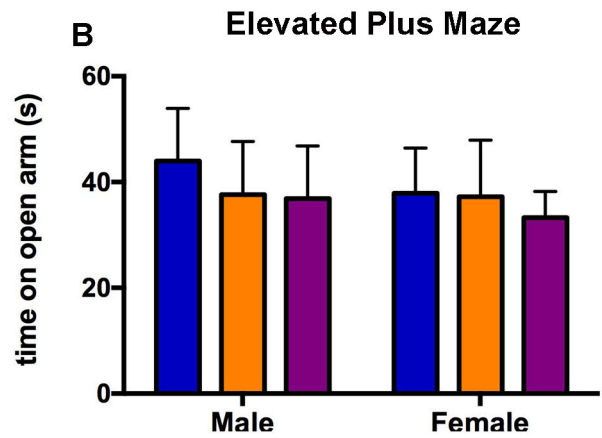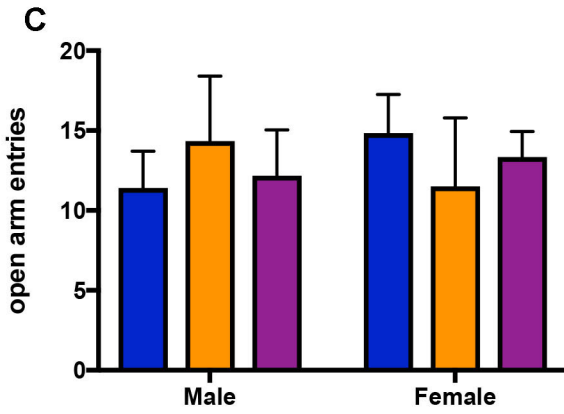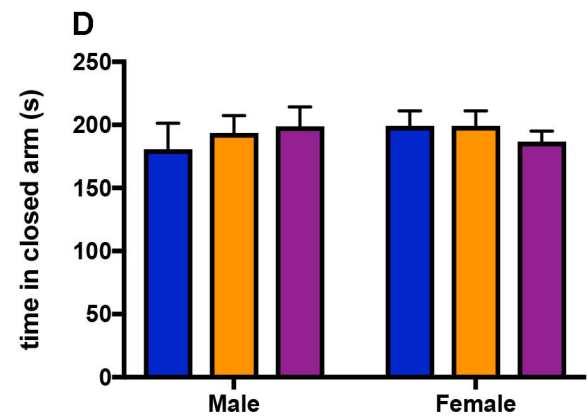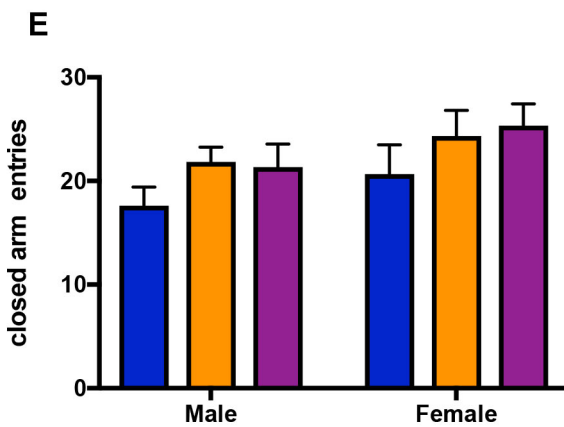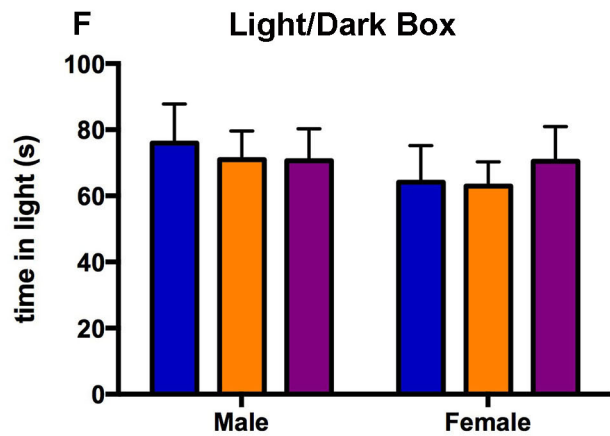

Supplemental Figure 4

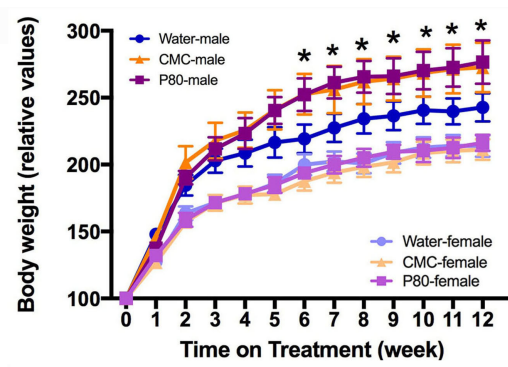

Supplemental Fig. 5



**A**

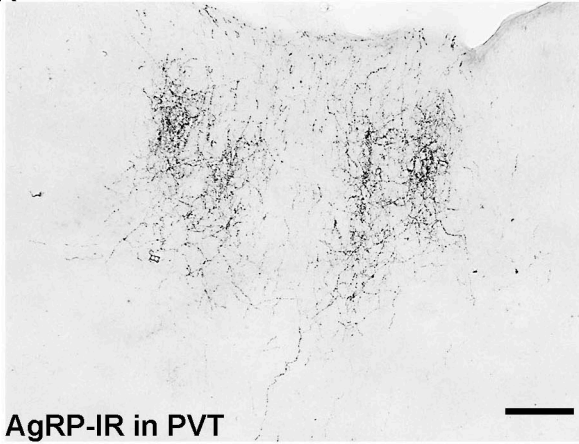

**B**

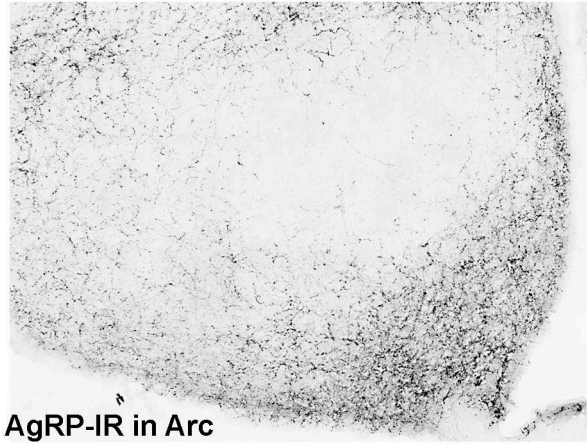

**C**

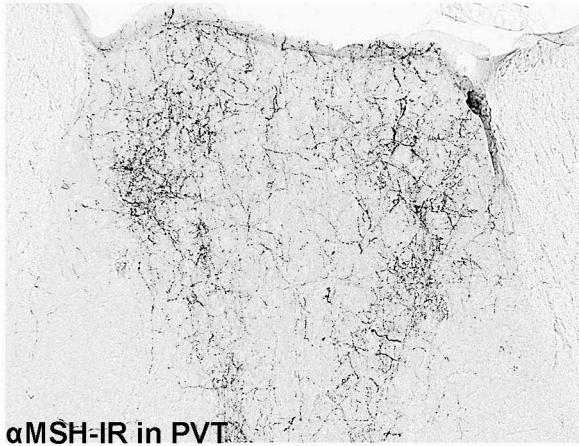

**D**

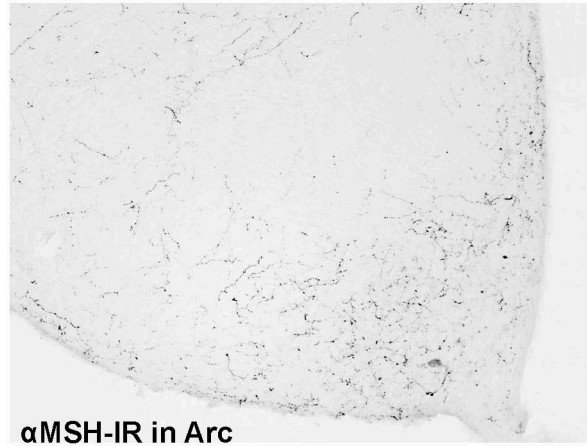

Supplemental Figure 6
